# Supplementary material for: Primary outcomes of the VIDI study: phase 2, double-masked, randomized, active-controlled study of ASP8232 for diabetic macular edema
Source: PubMed Central journal article supplement (PMC6670150; doi:10.1186/s40942-019-0178-7), 2019-08-01
Supplement: 40942_2019_178_MOESM1_ESM.pdf [file 40942_2019_178_MOESM1_ESM.pdf]

**Additional File 1. Table S1. Baseline Characteristics (Safety Analysis Set)**

| <b>Parameter</b>                             | <b>ASP8232<br/>(n=32)</b> | <b>ASP8232/ranibizumab<br/>(n=33)</b> | <b>Ranibizumab<br/>(n=31)</b> |
|----------------------------------------------|---------------------------|---------------------------------------|-------------------------------|
| HbA1c (%)                                    |                           |                                       |                               |
| Mean (SD)                                    | 8.5 (1.8)                 | 8.02 (1.46)                           | 7.97 (1.36)                   |
| Median                                       | 7.85                      | 7.8                                   | 7.75                          |
| Range                                        | 6.5–12.0                  | 5.6–11.6                              | 6.2–11.6                      |
| Cholesterol (mmol/L)                         |                           |                                       |                               |
| Mean (SD)                                    | 4.990 (1.318)             | 4.959 (1.681)                         | 4.519 (0.964)                 |
| Median                                       | 4.694                     | 4.267                                 | 4.500                         |
| Range                                        | 2.79–8.38                 | 3.23–10.71                            | 2.77–6.90                     |
| Triglycerides (mmol/L)                       |                           |                                       |                               |
| Mean (SD)                                    | 2.064 (0.988)             | 2.582 (3.483)                         | 1.877 (0.801)                 |
| Median                                       | 1.727                     | 1.648                                 | 1.773                         |
| Range                                        | 0.77–4.72                 | 0.88–20.66                            | 0.78–3.86                     |
| Diastolic Blood Pressure (mmHg) <sup>#</sup> |                           |                                       |                               |
| Mean (SD)                                    | 77.84 (8.28)              | 75.59 (8.59)                          | 72.63 (6.51)                  |
| Median                                       | 79.00                     | 77.00                                 | 73.00                         |
| Range                                        | 53.5–89.5                 | 51.5–90.5                             | 58.0–83.5                     |
| Systolic Blood Pressure (mmHg) <sup>#</sup>  |                           |                                       |                               |
| Mean (SD)                                    | 137.17 (14.19)            | 139.89 (13.78)                        | 132.63 (14.51)                |
| Median                                       | 137.25                    | 142.00                                | 130.00                        |
| Range                                        | 113.5–161.0               | 111.0–158.0                           | 110.0–180.5                   |

<sup>#</sup>Mean of the last two assessments.
