# Supplementary material for: Primary outcomes of the VIDI study: phase 2, double-masked, randomized, active-controlled study of ASP8232 for diabetic macular edema
Source: PubMed Central journal article supplement (PMC6670150; doi:10.1186/s40942-019-0178-7), 2019-08-01
Supplement: 40942_2019_178_MOESM2_ESM.pdf [file 40942_2019_178_MOESM2_ESM.pdf]

**Additional File 2. Table S2. Ocular TEAEs (Safety Analysis Set)**

|                                                                 | <b>ASP8232<br/>(N=32)</b> | <b>ASP8232/ranibizumab<br/>(N=33)</b> | <b>Ranibizumab<br/>(N=31)</b> |
|-----------------------------------------------------------------|---------------------------|---------------------------------------|-------------------------------|
| <b>Ocular TEAEs</b>                                             | 10 (31.3)                 | 13 (39.4)                             | 12 (38.7)                     |
| <b>Eye disorders</b>                                            | 8 (25.0)                  | 13 (39.4)                             | 12 (38.7)                     |
| Cataract                                                        | 0                         | 0                                     | 1 (3.2)                       |
| Cataract nuclear                                                | 0                         | 1 (3.0)                               | 0                             |
| Conjunctival haemorrhage                                        | 0                         | 3 (9.1)                               | 0                             |
| Diabetic retinal oedema                                         | 3 (9.4)                   | 1 (3.0)                               | 2 (6.5)                       |
| Diabetic retinopathy                                            | 0                         | 0                                     | 1 (3.2)                       |
| Dry eye                                                         | 0                         | 1 (3.0)                               | 0                             |
| Foreign body sensation in eyes                                  | 0                         | 0                                     | 1 (3.2)                       |
| Iridocyclitis                                                   | 0                         | 1 (3.0)                               | 0                             |
| Iris adhesions                                                  | 0                         | 1 (3.0)                               | 0                             |
| Lipaemia retinalis                                              | 0                         | 0                                     | 1 (3.2)                       |
| Macular cyst                                                    | 0                         | 0                                     | 1 (3.2)                       |
| Macular fibrosis                                                | 0                         | 0                                     | 1 (3.2)                       |
| Metamorphopsia                                                  | 0                         | 0                                     | 1 (3.2)                       |
| Photophobia                                                     | 0                         | 0                                     | 1 (3.2)                       |
| Retinal aneurysm                                                | 0                         | 0                                     | 2 (6.5)                       |
| Retinal disorder                                                | 1 (3.1)                   | 1 (3.0)                               | 0                             |
| Retinal exudates                                                | 2 (6.3)                   | 2 (6.1)                               | 1 (3.2)                       |
| Retinal neovascularisation                                      | 0                         | 0                                     | 1 (3.2)                       |
| Retinal vascular disorder                                       | 1 (3.1)                   | 0                                     | 0                             |
| Scotoma                                                         | 0                         | 1 (3.0)                               | 0                             |
| Vision blurred                                                  | 1 (3.1)                   | 1 (3.0)                               | 1 (3.2)                       |
| Visual acuity reduced                                           | 0                         | 2 (6.1)                               | 1 (3.2)                       |
| Vitreous detachment                                             | 1 (3.1)                   | 1 (3.0)                               | 0                             |
| Vitreous floaters                                               | 1 (3.1)                   | 2 (6.1)                               | 1 (3.2)                       |
| Vitreous hemorrhage                                             | 0                         | 2 (6.1)                               | 2 (6.5)                       |
| <b>General disorders and<br/>administration site conditions</b> | 0                         | 0                                     | 1 (3.2)                       |
| Injection site pain                                             | 0                         | 0                                     | 1 (3.2)                       |
| <b>Injury, poisoning, and procedural<br/>complication</b>       | 2 (6.3)                   | 0                                     | 0                             |
| Corneal abrasion                                                | 1 (3.1)                   | 0                                     | 0                             |
| Eye operation complication                                      | 1 (3.1)                   | 0                                     | 0                             |
| <b>Investigations</b>                                           | 1 (3.1)                   | 0                                     | 0                             |
| Intraocular pressure fluctuation                                | 1 (3.1)                   | 0                                     | 0                             |
| <b>Nervous system disorders</b>                                 | 0                         | 1 (3.0)                               | 0                             |
| IV <sup>th</sup> nerve paralysis                                | 0                         | 1 (3.0)                               | 0                             |

Data are presented as n (%).
